# Supplementary material for: Solar-microbial hybrid device based on oxygen-deficient niobium pentoxide anodes for sustainable hydrogen production
Source: Royal Society of Chemistry journal article supplement (doi:10.1039/c5sc03249k), 2015-01-01
Supplement: c5sc03249k2.pdf [file c5sc03249k2.pdf]

# Solar-Microbial Hybrid Device based on Oxygen-deficient Niobium Pentoxide Anodes for Sustainable Hydrogen Production

*Mingyang Li,<sup>a</sup> Xinjun He,<sup>a</sup> Yinxiang Zeng,<sup>a</sup> Meiqiong Chen,<sup>a,b</sup> Ziyang Zhang,<sup>a</sup> Hao Yang,<sup>a</sup> Pingping Fang,<sup>\*a</sup> Xihong Lu,<sup>\*a</sup> and Yexiang Tong<sup>\*,a</sup>*

<sup>a</sup>KLGHEI of Environment and Energy Chemistry, MOE of the Key Laboratory of Bioinorganic and Synthetic Chemistry, School of Chemistry and Chemical Engineering, Sun Yat-Sen University, Guangzhou 510275, China.

<sup>b</sup>Dongguan Key Laboratory of Green Energy, City college of Dongguan University of Technology, Wenchang Road, Dongguan, 523419 China.

**Video S1.** This video shows the real time hydrogen production in PEC-MFC hybrid device with/without the illumination. The PEC and MFC was combined in series. The release of gases from the Nb<sub>2</sub>O<sub>5-x</sub> NPs and bubbling can be observed starting after introducing the white light at 00:15.

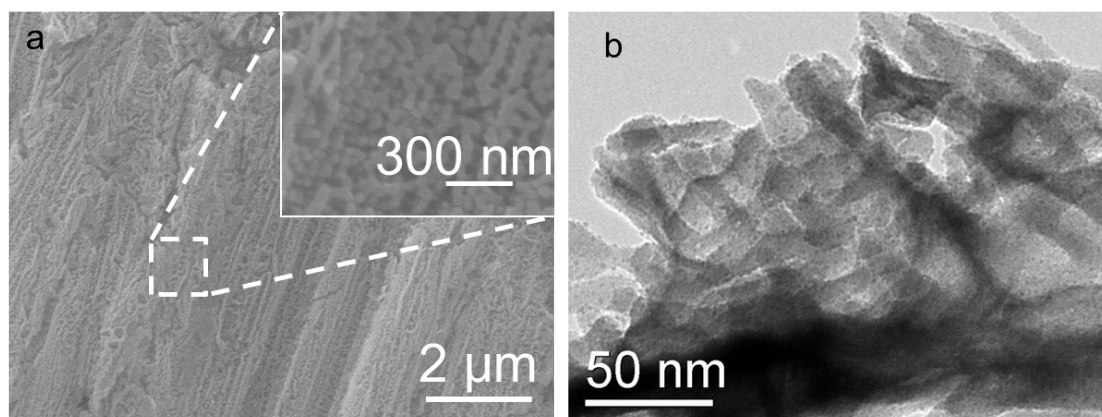

**Figure S1.** (a) SEM and (b) TEM images of  $\text{Nb}_2\text{O}_5$  NPs.

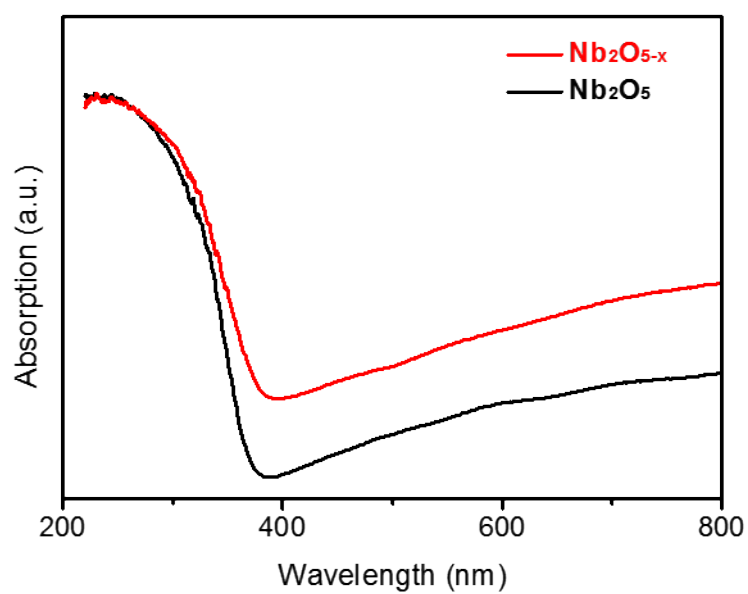

**Figure S2.** Absorption UV-visible spectra of  $\text{Nb}_2\text{O}_5$  and  $\text{Nb}_2\text{O}_{5-x}$  NPs; inset: picture of  $\text{Nb}_2\text{O}_5$  and  $\text{Nb}_2\text{O}_{5-x}$  NPs.

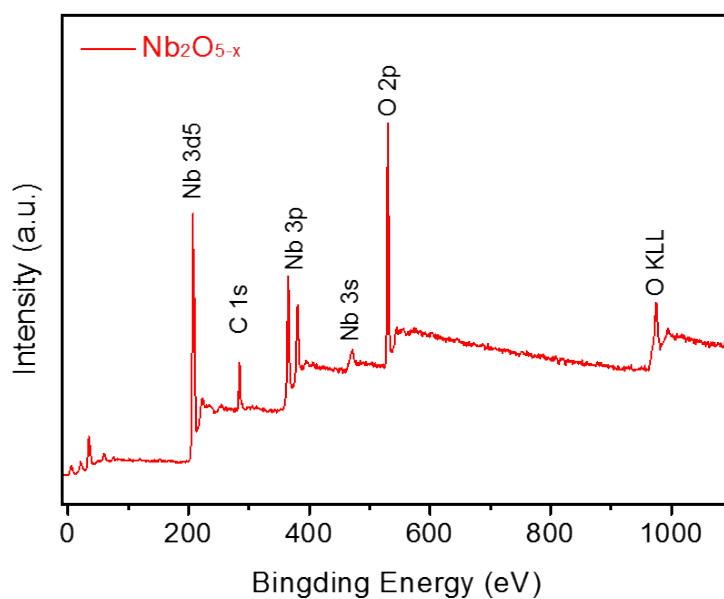

**Figure S3.** XPS survey spectrum collected for  $\text{Nb}_2\text{O}_{5-x}$  NPs.

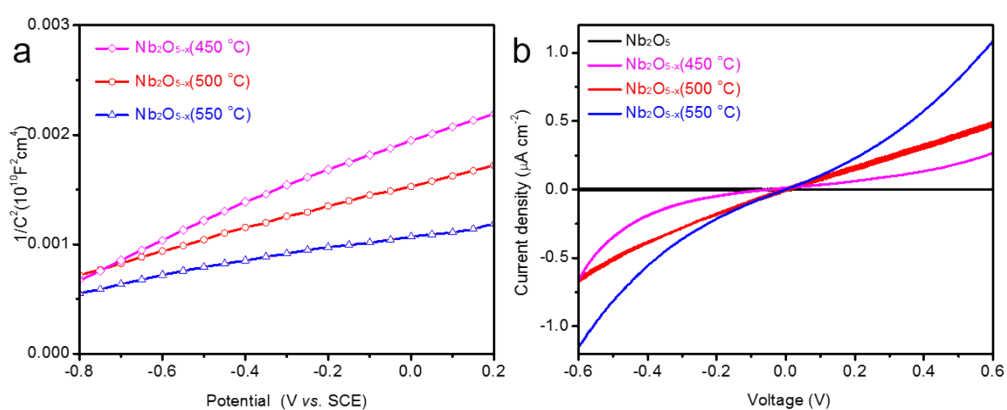

**Figure S4.** (a) Mott-Schottky plots of  $\text{Nb}_2\text{O}_{5-x}$  NPs treated at different temperature at a frequency of 1 kHz in the dark; (b) Comparison of  $I$ - $V$  curves of the samples.

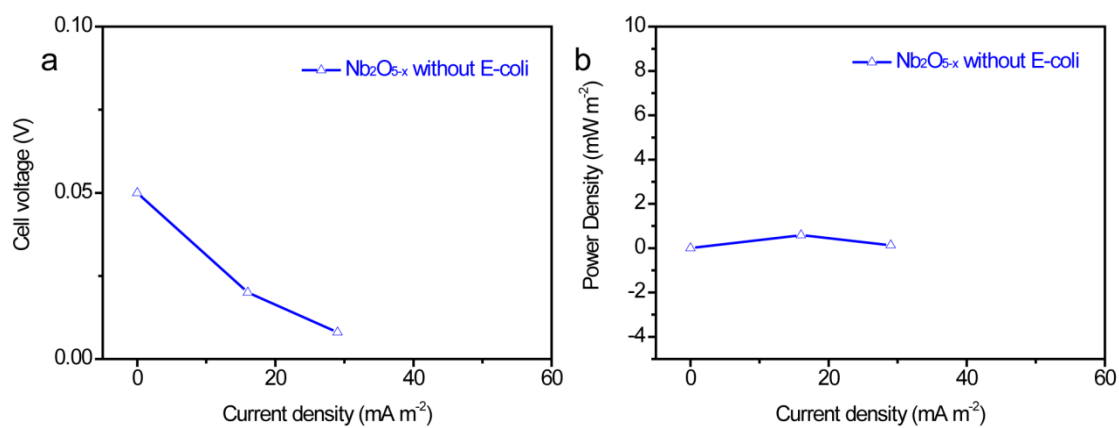

**Figure S5.** (a) polarization curves and (b) power outputs for  $\text{Nb}_2\text{O}_{5-x}$ -MFC without E-coli.

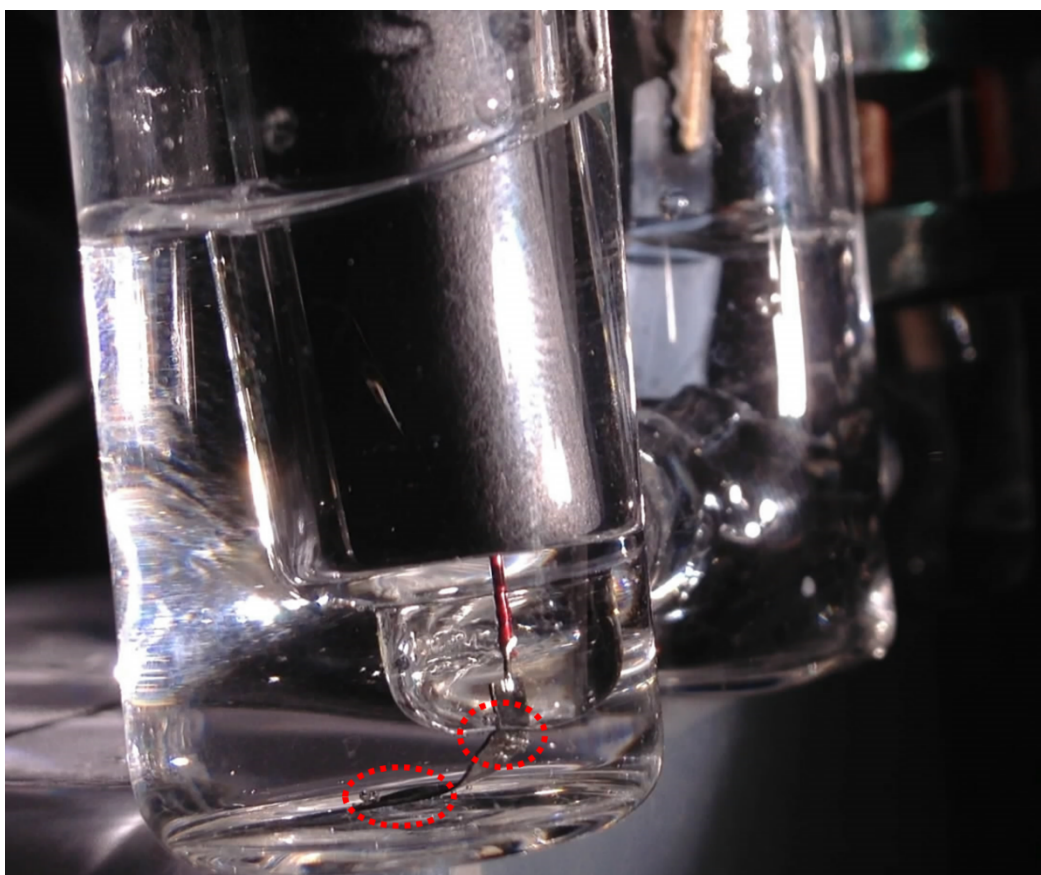

**Figure S6.** The red circle showing gas bubbles evolving from the Pt electrode under the illumination in the PEC-MFC hybrid device.

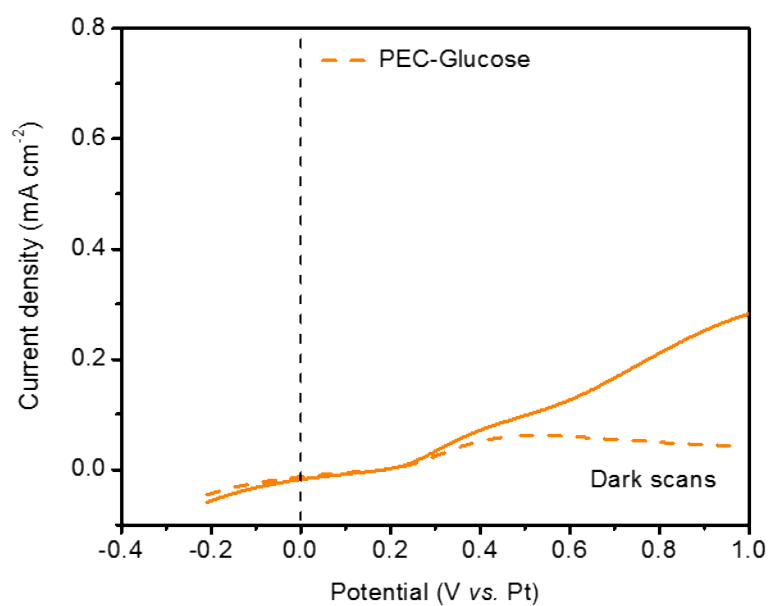

**Figure S7.** *I-V* curves collected from a PEC device in the presence of glucose agent (orange) with the Nb<sub>2</sub>O<sub>5-x</sub> NPs electrodes at a scan rate of 10 mV/s with/without the white light illumination.

**Table S1.** The summary of the photocurrent of Nb<sub>2</sub>O<sub>5</sub>-based electrodes.

| Electrode                                       | Electrolyte                           | Potential window<br><sup>a</sup> (vs. Ag/AgCl);<br><sup>b</sup> (vs. SCE) | Photocurrent                      | Illumination intensity | Ref. |
|-------------------------------------------------|---------------------------------------|---------------------------------------------------------------------------|-----------------------------------|------------------------|------|
| N-doped Nb <sub>2</sub> O <sub>5</sub>          | 0.1 M Na <sub>2</sub> SO <sub>4</sub> | 0 – 0.8 V <sup>a</sup>                                                    | 0.014 mA/cm <sup>2</sup> at 0.8 V | N. A.                  | [1]  |
| Ag <sub>2</sub> Nb <sub>4</sub> O <sub>11</sub> | 0.5 M Na <sub>2</sub> SO <sub>4</sub> | 0.4 – 1.0 V <sup>a</sup>                                                  | 0.003 mA at 1.0 V                 | N. A.                  | [2]  |

|                                               |                                                                                                                                                    |                           |                                  |                        |           |
|-----------------------------------------------|----------------------------------------------------------------------------------------------------------------------------------------------------|---------------------------|----------------------------------|------------------------|-----------|
| $\text{Bi}_3\text{NbO}_7$                     | 0.5 M $\text{Na}_2\text{SO}_4$                                                                                                                     | 0 – 1.0 V <sup>b</sup>    | 0.01 mA/cm <sup>2</sup> at 1.0 V | 150 mW/cm <sup>2</sup> | [3]       |
| $\text{Fe}_2\text{O}_3/\text{Nb}_2\text{O}_5$ | A buffer solution of pH=7 containing 0.2 M $\text{Na}_2\text{B}_4\text{O}_7$ , 0.14 M $\text{H}_2\text{SO}_4$ , and 0.3 M $\text{Na}_2\text{SO}_4$ | 0 – 1.5 V <sup>b</sup>    | 0.8 mA/cm <sup>2</sup> at 0.75 V | N. A.                  | [4]       |
| $\text{Nb}_2\text{O}_{5-x}$                   | 1.0 M NaOH                                                                                                                                         | -1.0 – 0.6 V <sup>b</sup> | 0.9 mA/cm <sup>2</sup> at 0.6 V  | 100 mW/cm <sup>2</sup> | This work |

#### SI References:

- [1] T. Ruff, R. Hahn, M. S. Killian, H. Asoh, S. Ono, P. Schmuki, *Electrochim. Acta* 2012, 62, 402.
- [2] H. Dong, G. Chen, J. Sun, Y. Feng, C. Li, C. Lv, *Chem. Commun.* 2014, 50, 6596.
- [3] J. Jiang, M. Wang, Q. Chen, S. Shen, M. Li, L. Guo, *RSC Adv.* 2014, 4, 10542.
- [4] H. Miyake, H. Kozuka, *J. Phys. Chem. B* 2005, 109, 17951.
